# Supplementary material
Source: publisher figshare collection journal article supplement (https://frontiersin.figshare.com/ndownloader/files/22393194)
Supplement: Supplementary file [file 22393194]

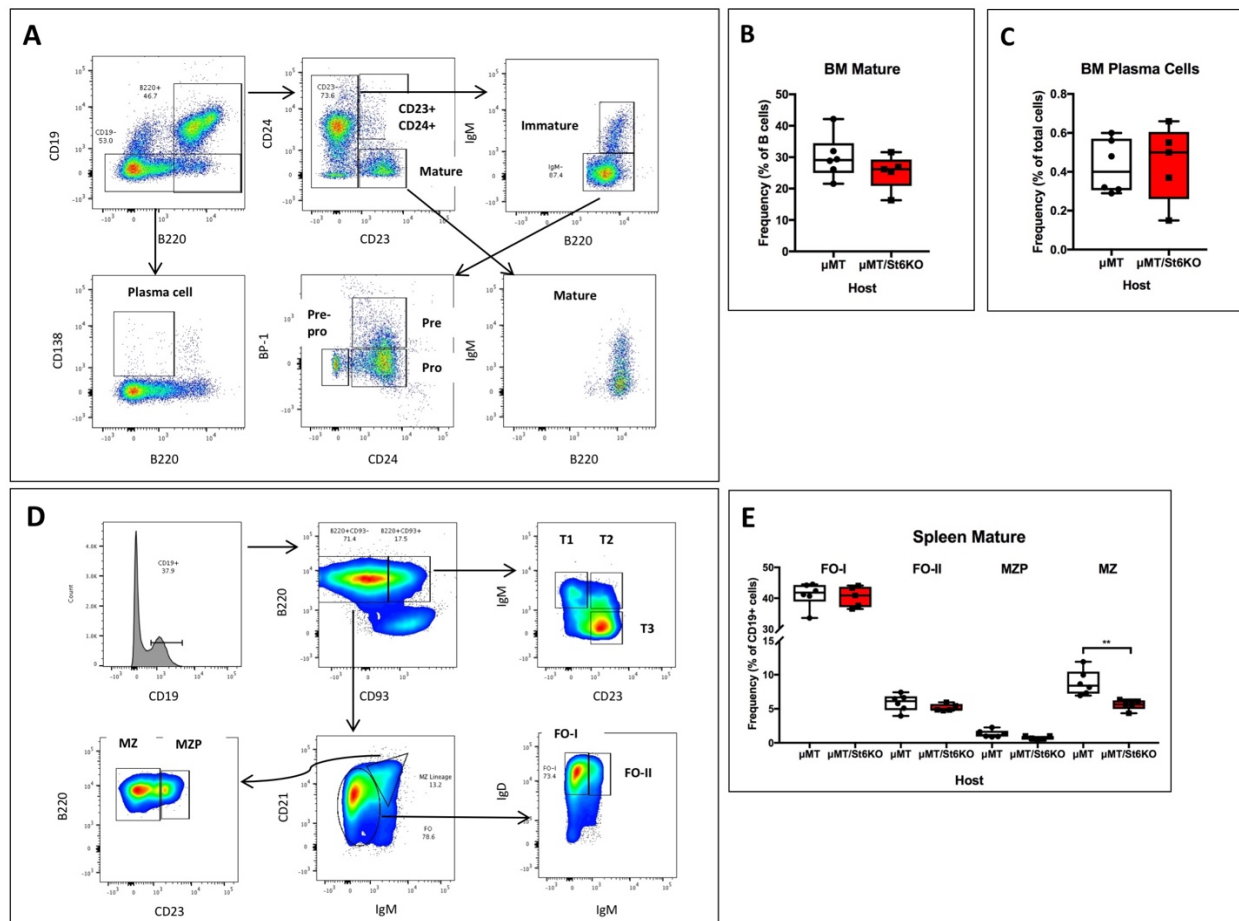

**Supplementary Figure S1. Flow cytometry gating scheme and B cell reconstitution.** (A) Gating of bone marrow B cell subpopulations. Quantification of bone marrow (B) mature B cells and (C) plasma cells in chimeras (n=5-6). (D) Gating of splenic B cell subpopulations. (E) Quantification of splenic B cell populations in chimeras (N=5-6). \*\* p<0.01
